# Supplementary material for: Bilingualism in autism: Language learning profiles and social experiences
Source: PubMed Central journal article supplement — Autism. 2020 Jul 17;24(8):2166–77. doi: 10.1177/1362361320937845 (PMC7549289; doi:10.1177/1362361320937845), 2020-07-17
Supplement: ABC_Paper_1_-_FV_-_Sup_Mat_1.pdf [file ABC_Paper_1_-_FV_-_Sup_Mat_1.pdf]

## Supplementary Materials s1: Autism & Bilingualism Census

|                                                                                                                                                                                                                                                                                                                                                                                                                                                                                                                                                                                                                                                                                                                                                                                                                                                                                                                                                                                                                                    |                                                                                    |
|------------------------------------------------------------------------------------------------------------------------------------------------------------------------------------------------------------------------------------------------------------------------------------------------------------------------------------------------------------------------------------------------------------------------------------------------------------------------------------------------------------------------------------------------------------------------------------------------------------------------------------------------------------------------------------------------------------------------------------------------------------------------------------------------------------------------------------------------------------------------------------------------------------------------------------------------------------------------------------------------------------------------------------|------------------------------------------------------------------------------------|
| <b>Autism &amp;<br/>Bilingualism<br/>Census</b>                                                                                                                                                                                                                                                                                                                                                                                                                                                                                                                                                                                                                                                                                                                                                                                                                                                                                                                                                                                    |  |
| <b>ABC - Autism and Bilingualism Census</b>                                                                                                                                                                                                                                                                                                                                                                                                                                                                                                                                                                                                                                                                                                                                                                                                                                                                                                                                                                                        |                                                                                    |
| Welcome!                                                                                                                                                                                                                                                                                                                                                                                                                                                                                                                                                                                                                                                                                                                                                                                                                                                                                                                                                                                                                           |                                                                                    |
| <p style="text-align: center;"><b>Welcome to the ABC!</b></p> <p>You are invited to participate in a web-based online survey for people on the autism spectrum. This survey is the first step of a research project exploring bilingualism in autism, conducted by <input type="text"/> at the University of <input type="text"/>. For more information, please visit <a href="http://www.&lt;input type=" text"=""></a>/"&gt;http://www.<input type="text"/>.</p> <p>While the word "Bilingualism" is in the very title of this survey, you don't have to be bilingual to participate! Whether you know 1, 2, 3, or even more languages, we welcome you all to our survey!</p> <p>With the ABC we want to compare the lifestyles of autistic people who know several languages with the lifestyles of autistic people who know one language. This is why you can take part in our survey even if you are not bilingual!</p> <p>If you have questions about the study, please feel free to contact me at <input type="text"/>.</p> |                                                                                    |

# Autism & Bilingualism Census

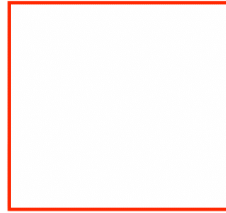

## ABC - Autism and Bilingualism Census

### Information and consent

Study title: Autism and Bilingualism Census

Principal Investigator: [redacted]

Researcher collecting current data: [redacted]

**Nature of the study.** You are about to participate in a study which involves answering questions about you and your language experience. Your responses will be collected online on SurveyMonkey.com. Filling in the survey should take you about 15 minutes, plus 3 minutes per language if you know more than 2 languages (for example, it will take you about 18 minutes if you know 3 languages). Full instructions will follow shortly. This study is conducted by [redacted]

**Compensation.** You will receive no direct benefits from participating in this research study.

**Risks and benefits.** There are no known risks to participation in this study. The only benefits to you personally are those you draw from making a contribution to our knowledge about language and its use. Your responses will help us assessing the extent of the bilingual population with autism in the United-Kingdom and bring recognition to this population.

**Confidentiality.** The data we collect will not be associated with your name or with any other personal details that might identify you. Your survey answers will be sent to a link at SurveyMonkey.com where data will be stored in a password protected electronic format. Survey Monkey does not collect identifying information such as your name, email address, or IP address. Therefore, your responses will remain anonymous. No one will be able to identify you or your answers, and no one will know whether or not you participated in the study. At the end of the survey you will be asked if you are interested in participating in the next steps of the research project. If you choose to provide your contact details your survey responses may no longer be anonymous to the researcher. However, no names or identifying information would be included in any publications or presentations based on these data, and your responses to this survey will remain confidential.

**Voluntary participation and right to withdraw.** Your participation is voluntary, and you may withdraw from the study at any time and for any reason. Because data are collected anonymously they cannot be withdrawn after submission.

**Contact information.** This research is being conducted by the above-listed researchers at the [redacted]. For questions or to report a research-related problem, please contact [redacted], or [redacted]. Contact [redacted] if you have concerns regarding your rights as a participant in the research.

If you have any questions about what you've just read, please contact the researchers before continuing.

Thank you for your help!

By completing this survey, you consent to the following:

1. I agree that the anonymized data I produce may be kept permanently in  and used for the specific research project which made them.
2. I agree that the anonymized data I produce may be used by the above-named researchers, as well as by other qualified researchers, for teaching or research purposes, and in professional presentations and publications.
3. I understand that I have the right to terminate this session at any point. Once my survey has been submitted, I understand that I will not be able to withdraw my data.

\* 1. Please confirm your consent by selecting the following statements.

- I have read the above information.
- I am 16 years of age or older.
- I voluntarily agree to participate in this survey.

# Autism & Bilingualism Census

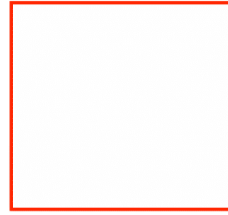

## ABC - Autism and Bilingualism Census

### Demographic information

#### On this page we will focus on information about yourself.

*As previously stated, you are free to skip any question asked in this survey.*

1. How old are you?

*Please give your age in years.*

2. In which country were you born?

3. In which country do you live now?

4. What is your current postcode or zip code ?

5. When did you arrive in the country where you live now?

*Please give your approximate age in years when you became a resident of your current country for the first time, or leave blank if you were born in your current country of residence.*

6. Do you have... ?

*Please select all that apply. The answer to this question will be relevant for following questions.*

- Brothers and / or sisters
- A partner (e.g. girl/boyfriend, husband/wife, etc.)
- Children

7. What is your current living situation?

Please select all that apply to your current living situation. The answer to this question will be relevant for following questions.

- With your parents
- With your brothers and sisters
- With flatmates and / or friends
- With your partner (e.g. husband/wife, boyfriend/girlfriend)
- With your children
- Alone
- Other (please specify)

8. What diagnostic category of autism do you identify with?

For example: autism, Asperger's syndrome, etc.

9. Autism spectrum diagnosis:

Please select the item that applies to your situation.

- You self-identify as being on the autism spectrum.
- You have a clinical diagnosis.  
How old were you when you were diagnosed with autism ?  
Please provide an estimate in years.

10. What type of school did you attend?

Please write the approximate number of years you attended each type of school in the box. For those that do not apply to your situation, write 0.

Specialist schools

Mainstream schools

Homeschool

Please give details.

11. Level of education and current occupation.

|                     | Highest level of school or the highest degree received | Current occupation   |
|---------------------|--------------------------------------------------------|----------------------|
| You                 | <input type="text"/>                                   | <input type="text"/> |
| Mother / guardian 1 | <input type="text"/>                                   | <input type="text"/> |
| Father / guardian 2 | <input type="text"/>                                   | <input type="text"/> |

12. With which gender identity do you most identify?

Female

Male

Prefer not to say

Not listed

13. We are about to ask you some questions about your current quality of life, and then some questions about the language(s) you speak. Before we do, is there anything else about you that you think we should know?

# Autism & Bilingualism Census

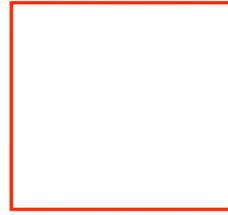

## ABC - Autism and Bilingualism Census

### Current quality of life

**These questions aim to help us understand how you feel about your life over the last week or two.**

1. Do you agree with the following statements regarding your satisfaction about your general life?

|                                                              | Strongly disagree     | Disagree              | Slightly disagree     | Neither agree nor disagree | Slightly agree        | Agree                 | Strongly agree        |
|--------------------------------------------------------------|-----------------------|-----------------------|-----------------------|----------------------------|-----------------------|-----------------------|-----------------------|
| In most ways my life is close to my ideal.                   | <input type="radio"/> | <input type="radio"/> | <input type="radio"/> | <input type="radio"/>      | <input type="radio"/> | <input type="radio"/> | <input type="radio"/> |
| The conditions of my life are excellent.                     | <input type="radio"/> | <input type="radio"/> | <input type="radio"/> | <input type="radio"/>      | <input type="radio"/> | <input type="radio"/> | <input type="radio"/> |
| I am satisfied with my life.                                 | <input type="radio"/> | <input type="radio"/> | <input type="radio"/> | <input type="radio"/>      | <input type="radio"/> | <input type="radio"/> | <input type="radio"/> |
| So far I have gotten the important things I want in life.    | <input type="radio"/> | <input type="radio"/> | <input type="radio"/> | <input type="radio"/>      | <input type="radio"/> | <input type="radio"/> | <input type="radio"/> |
| If I could live my life over, I would change almost nothing. | <input type="radio"/> | <input type="radio"/> | <input type="radio"/> | <input type="radio"/>      | <input type="radio"/> | <input type="radio"/> | <input type="radio"/> |

2. Do you agree with the following statements about your current mood?

|                                                         | Strongly disagree     | Disagree              | Slightly disagree     | Neither agree nor disagree | Slightly agree        | Agree                 | Strongly agree        |
|---------------------------------------------------------|-----------------------|-----------------------|-----------------------|----------------------------|-----------------------|-----------------------|-----------------------|
| I feel blue, unhappy.                                   | <input type="radio"/> | <input type="radio"/> | <input type="radio"/> | <input type="radio"/>      | <input type="radio"/> | <input type="radio"/> | <input type="radio"/> |
| I feel fatigued.                                        | <input type="radio"/> | <input type="radio"/> | <input type="radio"/> | <input type="radio"/>      | <input type="radio"/> | <input type="radio"/> | <input type="radio"/> |
| I feel depressed.                                       | <input type="radio"/> | <input type="radio"/> | <input type="radio"/> | <input type="radio"/>      | <input type="radio"/> | <input type="radio"/> | <input type="radio"/> |
| I feel worried.                                         | <input type="radio"/> | <input type="radio"/> | <input type="radio"/> | <input type="radio"/>      | <input type="radio"/> | <input type="radio"/> | <input type="radio"/> |
| I feel anxious.                                         | <input type="radio"/> | <input type="radio"/> | <input type="radio"/> | <input type="radio"/>      | <input type="radio"/> | <input type="radio"/> | <input type="radio"/> |
| I feel irritated easily.                                | <input type="radio"/> | <input type="radio"/> | <input type="radio"/> | <input type="radio"/>      | <input type="radio"/> | <input type="radio"/> | <input type="radio"/> |
| I do not sleep well.                                    | <input type="radio"/> | <input type="radio"/> | <input type="radio"/> | <input type="radio"/>      | <input type="radio"/> | <input type="radio"/> | <input type="radio"/> |
| I have lost, or gained, weight without going on a diet. | <input type="radio"/> | <input type="radio"/> | <input type="radio"/> | <input type="radio"/>      | <input type="radio"/> | <input type="radio"/> | <input type="radio"/> |
| I am unable to make decisions.                          | <input type="radio"/> | <input type="radio"/> | <input type="radio"/> | <input type="radio"/>      | <input type="radio"/> | <input type="radio"/> | <input type="radio"/> |
| I am not satisfied with the way I spend my free time.   | <input type="radio"/> | <input type="radio"/> | <input type="radio"/> | <input type="radio"/>      | <input type="radio"/> | <input type="radio"/> | <input type="radio"/> |
| I have lost interests in things I used to care about.   | <input type="radio"/> | <input type="radio"/> | <input type="radio"/> | <input type="radio"/>      | <input type="radio"/> | <input type="radio"/> | <input type="radio"/> |



3. Do you agree with the following statements about your social life?

|                                                                                                     | Strongly disagree     | Disagree              | Slightly disagree     | Neither agree nor disagree | Slightly agree        | Agree                 | Strongly agree        |
|-----------------------------------------------------------------------------------------------------|-----------------------|-----------------------|-----------------------|----------------------------|-----------------------|-----------------------|-----------------------|
| I am satisfied with my personal relationships.                                                      | <input type="radio"/> | <input type="radio"/> | <input type="radio"/> | <input type="radio"/>      | <input type="radio"/> | <input type="radio"/> | <input type="radio"/> |
| I find it easy to work with other people.                                                           | <input type="radio"/> | <input type="radio"/> | <input type="radio"/> | <input type="radio"/>      | <input type="radio"/> | <input type="radio"/> | <input type="radio"/> |
| I often meet socially with friends, family members or colleagues.                                   | <input type="radio"/> | <input type="radio"/> | <input type="radio"/> | <input type="radio"/>      | <input type="radio"/> | <input type="radio"/> | <input type="radio"/> |
| I have several friends and/or family members with whom I can discuss intimate and personal matters. | <input type="radio"/> | <input type="radio"/> | <input type="radio"/> | <input type="radio"/>      | <input type="radio"/> | <input type="radio"/> | <input type="radio"/> |
| I engage online in social activities and/or organisations related to my interests.                  | <input type="radio"/> | <input type="radio"/> | <input type="radio"/> | <input type="radio"/>      | <input type="radio"/> | <input type="radio"/> | <input type="radio"/> |
| I participate in person in group activities and/or organisations related to my interests.           | <input type="radio"/> | <input type="radio"/> | <input type="radio"/> | <input type="radio"/>      | <input type="radio"/> | <input type="radio"/> | <input type="radio"/> |
| I like to get involved in activities with people I know.                                            | <input type="radio"/> | <input type="radio"/> | <input type="radio"/> | <input type="radio"/>      | <input type="radio"/> | <input type="radio"/> | <input type="radio"/> |
| I like to get involved in activities with people I don't know.                                      | <input type="radio"/> | <input type="radio"/> | <input type="radio"/> | <input type="radio"/>      | <input type="radio"/> | <input type="radio"/> | <input type="radio"/> |
| I can easily make new friends.                                                                      | <input type="radio"/> | <input type="radio"/> | <input type="radio"/> | <input type="radio"/>      | <input type="radio"/> | <input type="radio"/> | <input type="radio"/> |
| I can easily maintain a friendship.                                                                 | <input type="radio"/> | <input type="radio"/> | <input type="radio"/> | <input type="radio"/>      | <input type="radio"/> | <input type="radio"/> | <input type="radio"/> |
| I get along with people who are close to me.                                                        | <input type="radio"/> | <input type="radio"/> | <input type="radio"/> | <input type="radio"/>      | <input type="radio"/> | <input type="radio"/> | <input type="radio"/> |
| I can easily deal with people I do not know.                                                        | <input type="radio"/> | <input type="radio"/> | <input type="radio"/> | <input type="radio"/>      | <input type="radio"/> | <input type="radio"/> | <input type="radio"/> |

4. Do you agree with the following statements about yourself?

|                                                                  | Strongly disagree     | Disagree              | Slightly disagree     | Neither agree nor disagree | Slightly agree        | Agree                 | Strongly agree        |
|------------------------------------------------------------------|-----------------------|-----------------------|-----------------------|----------------------------|-----------------------|-----------------------|-----------------------|
| I can concentrate on doing something for ten minutes.            | <input type="radio"/> | <input type="radio"/> | <input type="radio"/> | <input type="radio"/>      | <input type="radio"/> | <input type="radio"/> | <input type="radio"/> |
| I remember to do important things.                               | <input type="radio"/> | <input type="radio"/> | <input type="radio"/> | <input type="radio"/>      | <input type="radio"/> | <input type="radio"/> | <input type="radio"/> |
| I can analyze and find solutions to problems in day-to-day life. | <input type="radio"/> | <input type="radio"/> | <input type="radio"/> | <input type="radio"/>      | <input type="radio"/> | <input type="radio"/> | <input type="radio"/> |
| I can easily learn a new task.                                   | <input type="radio"/> | <input type="radio"/> | <input type="radio"/> | <input type="radio"/>      | <input type="radio"/> | <input type="radio"/> | <input type="radio"/> |
| I can easily start and maintain a conversation.                  | <input type="radio"/> | <input type="radio"/> | <input type="radio"/> | <input type="radio"/>      | <input type="radio"/> | <input type="radio"/> | <input type="radio"/> |
| I can easily relax and / or enjoy myself.                        | <input type="radio"/> | <input type="radio"/> | <input type="radio"/> | <input type="radio"/>      | <input type="radio"/> | <input type="radio"/> | <input type="radio"/> |

# Autism & Bilingualism Census

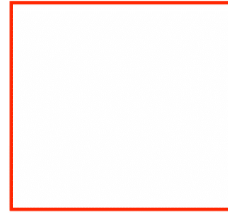

## ABC - Autism and Bilingualism Census

### First language

**This page will focus on your first language. This is the language your parents spoke to you from birth. If you spoke more than one language from birth you can tell us about each one on the next page(s).**

***Of course, if you only speak one language, your first language is also your only language!***

#### 1. First Language

What is your first language (L1)?

#### 2. Current L1 proficiency

|                                        | Not at all            | Very poor             | Poor                  | Slightly less than adequate | Adequate              | Slightly more than adequate | Good                  | Very good             | Excellent             |
|----------------------------------------|-----------------------|-----------------------|-----------------------|-----------------------------|-----------------------|-----------------------------|-----------------------|-----------------------|-----------------------|
| How well do you speak L1?              | <input type="radio"/> | <input type="radio"/> | <input type="radio"/> | <input type="radio"/>       | <input type="radio"/> | <input type="radio"/>       | <input type="radio"/> | <input type="radio"/> | <input type="radio"/> |
| How well do you understand spoken L1?  | <input type="radio"/> | <input type="radio"/> | <input type="radio"/> | <input type="radio"/>       | <input type="radio"/> | <input type="radio"/>       | <input type="radio"/> | <input type="radio"/> | <input type="radio"/> |
| How well do you write L1?              | <input type="radio"/> | <input type="radio"/> | <input type="radio"/> | <input type="radio"/>       | <input type="radio"/> | <input type="radio"/>       | <input type="radio"/> | <input type="radio"/> | <input type="radio"/> |
| How well do you understand written L1? | <input type="radio"/> | <input type="radio"/> | <input type="radio"/> | <input type="radio"/>       | <input type="radio"/> | <input type="radio"/>       | <input type="radio"/> | <input type="radio"/> | <input type="radio"/> |

3. Past exposure: While growing up, how much did you use L1 with...?

If a group of people listed below is not applicable to you (e.g. "brothers and sisters" if you are a single child), please select "N/A".

|                                                                      | Never                 | Very rarely           | Rarely                | Occasionally          | Frequently            | Very frequently       | Always                | N/A                   |
|----------------------------------------------------------------------|-----------------------|-----------------------|-----------------------|-----------------------|-----------------------|-----------------------|-----------------------|-----------------------|
| Your mother / guardian 1                                             | <input type="radio"/> |
| Your father / guardian 2                                             | <input type="radio"/> |
| Your brothers and sisters                                            | <input type="radio"/> |
| Other adults in the household                                        | <input type="radio"/> |
| Other members of your family                                         | <input type="radio"/> |
| Your friends                                                         | <input type="radio"/> |
| People at school                                                     | <input type="radio"/> |
| People in the community (e.g. in local shops, with neighbours, etc.) | <input type="radio"/> |

Please enter any comment below.

4. Current use: With other people, do you use L1...?

If a group of people listed below is not applicable to you (e.g. "brothers and sisters" if you are a single child), please select "N/A".

|                                                             | Never                 | Very rarely           | Rarely                | Occasionally          | Frequently            | Very frequently       | Always                | N/A                   |
|-------------------------------------------------------------|-----------------------|-----------------------|-----------------------|-----------------------|-----------------------|-----------------------|-----------------------|-----------------------|
| With your mother / guardian 1                               | <input type="radio"/> |
| With your father / guardian 2                               | <input type="radio"/> |
| With your brothers and sisters                              | <input type="radio"/> |
| With your partner (e.g. husband/wife, boyfriend/girlfriend) | <input type="radio"/> |
| With your children                                          | <input type="radio"/> |
| With other members of your family                           | <input type="radio"/> |
| At school / work                                            | <input type="radio"/> |
| With your flatmates                                         | <input type="radio"/> |
| In the community                                            | <input type="radio"/> |

Other (please specify)

5. Current use: In your mind, do you use L1 to...?

|                           | Never                 | Very rarely           | Rarely                | Occasionally          | Frequently            | Very frequently       | Always                |
|---------------------------|-----------------------|-----------------------|-----------------------|-----------------------|-----------------------|-----------------------|-----------------------|
| Express emotions          | <input type="radio"/> |
| Swear                     | <input type="radio"/> |
| Remember some information | <input type="radio"/> |
| Do maths                  | <input type="radio"/> |
| Think                     | <input type="radio"/> |

6. Current use: Do you use L1 when...?

|                                                | Never                 | Very rarely           | Rarely                | Occasionally          | Frequently            | Very frequently       | Always                |
|------------------------------------------------|-----------------------|-----------------------|-----------------------|-----------------------|-----------------------|-----------------------|-----------------------|
| Reading                                        | <input type="radio"/> |
| Watching TV or videos / listening to the radio | <input type="radio"/> |
| Using computers / tablets                      | <input type="radio"/> |
| Doing other activities outside of home         | <input type="radio"/> |

7. Is there anything else you wish to tell us about your L1 past exposure / past or current use?

8. Do you know any other languages?

- Yes  
 No

# Autism & Bilingualism Census

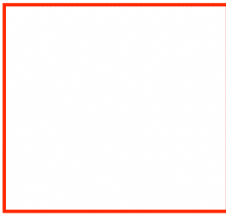

## ABC - Autism and Bilingualism Census

### Second language

This page will focus on your second language.

#### 1. Second Language

What is your second language (L2)?

How old were you when you first encountered L2?

How did you first encounter L2?

#### 2. Current L2 proficiency

|                                        | Not at all            | Very poor             | Poor                  | Slightly less than adequate | Adequate              | Slightly more than adequate | Good                  | Very good             | Excellent             |
|----------------------------------------|-----------------------|-----------------------|-----------------------|-----------------------------|-----------------------|-----------------------------|-----------------------|-----------------------|-----------------------|
| How well do you speak L2?              | <input type="radio"/> | <input type="radio"/> | <input type="radio"/> | <input type="radio"/>       | <input type="radio"/> | <input type="radio"/>       | <input type="radio"/> | <input type="radio"/> | <input type="radio"/> |
| How well do you understand spoken L2?  | <input type="radio"/> | <input type="radio"/> | <input type="radio"/> | <input type="radio"/>       | <input type="radio"/> | <input type="radio"/>       | <input type="radio"/> | <input type="radio"/> | <input type="radio"/> |
| How well do you write L2?              | <input type="radio"/> | <input type="radio"/> | <input type="radio"/> | <input type="radio"/>       | <input type="radio"/> | <input type="radio"/>       | <input type="radio"/> | <input type="radio"/> | <input type="radio"/> |
| How well do you understand written L2? | <input type="radio"/> | <input type="radio"/> | <input type="radio"/> | <input type="radio"/>       | <input type="radio"/> | <input type="radio"/>       | <input type="radio"/> | <input type="radio"/> | <input type="radio"/> |

3. Past exposure: While learning L2, how much did you use it with...?

If a group of people listed below is not applicable to you (e.g. "brothers and sisters" if you are a single child), please select "N/A".

|                                                                      | Never                 | Very rarely           | Rarely                | Occasionally          | Frequently            | Very frequently       | Always                | N/A                   |
|----------------------------------------------------------------------|-----------------------|-----------------------|-----------------------|-----------------------|-----------------------|-----------------------|-----------------------|-----------------------|
| Your mother / guardian 1                                             | <input type="radio"/> |
| Your father / guardian 2                                             | <input type="radio"/> |
| Your brothers and sisters                                            | <input type="radio"/> |
| Other adults in the household                                        | <input type="radio"/> |
| Other members of your family                                         | <input type="radio"/> |
| Your friends                                                         | <input type="radio"/> |
| People at school / work                                              | <input type="radio"/> |
| People in the community (e.g. in local shops, with neighbours, etc.) | <input type="radio"/> |

Please enter any comment below.

4. Current use: With other people, do you use L2...?

If a group of people listed below is not applicable to you (e.g. "brothers and sisters" if you are a single child), please select "N/A".

|                                                             | Never                 | Very rarely           | Rarely                | Occasionally          | Frequently            | Very frequently       | Always                | N/A                   |
|-------------------------------------------------------------|-----------------------|-----------------------|-----------------------|-----------------------|-----------------------|-----------------------|-----------------------|-----------------------|
| With your mother / guardian 1                               | <input type="radio"/> |
| With your father / guardian 2                               | <input type="radio"/> |
| With your brothers and sisters                              | <input type="radio"/> |
| With your partner (e.g. husband/wife, boyfriend/girlfriend) | <input type="radio"/> |
| With your children                                          | <input type="radio"/> |
| With other members of your family                           | <input type="radio"/> |
| With your friends                                           | <input type="radio"/> |
| At school / work                                            | <input type="radio"/> |
| With your flatmates                                         | <input type="radio"/> |
| In the community                                            | <input type="radio"/> |

Other (please specify)

5. Current use: In your mind, do you use L2 to...?

|                           | Never                 | Very rarely           | Rarely                | Occasionally          | Frequently            | Very frequently       | Always                |
|---------------------------|-----------------------|-----------------------|-----------------------|-----------------------|-----------------------|-----------------------|-----------------------|
| Express emotions          | <input type="radio"/> |
| Swear                     | <input type="radio"/> |
| Remember some information | <input type="radio"/> |
| Do maths                  | <input type="radio"/> |
| Think                     | <input type="radio"/> |

6. Current use: Do you use L2 when...?

|                                                | Never                 | Very rarely           | Rarely                | Occasionally          | Frequently            | Very frequently       | Always                |
|------------------------------------------------|-----------------------|-----------------------|-----------------------|-----------------------|-----------------------|-----------------------|-----------------------|
| Reading                                        | <input type="radio"/> |
| Watching TV or videos / listening to the radio | <input type="radio"/> |
| Using computers / tablets                      | <input type="radio"/> |
| Doing other activities outside of home         | <input type="radio"/> |

7. Is there anything else you wish to tell us about your L2 past exposure / past or current use?

8. Do you know any other languages?

- Yes  
 No



# Autism & Bilingualism Census

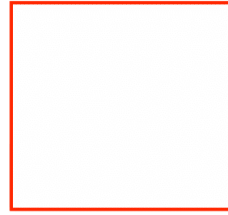

## ABC - Autism and Bilingualism Census

### Third language

**This page will focus on your third language.**

#### 1. Third Language

What is your third language (L3)?

How old were you when you first encountered L3?

How did you first encounter L3?

#### 2. Current L3 proficiency

|                                        | Not at all            | Very poor             | Poor                  | Slightly less than adequate | Adequate              | Slightly more than adequate | Good                  | Very good             | Excellent             |
|----------------------------------------|-----------------------|-----------------------|-----------------------|-----------------------------|-----------------------|-----------------------------|-----------------------|-----------------------|-----------------------|
| How well do you speak L3?              | <input type="radio"/> | <input type="radio"/> | <input type="radio"/> | <input type="radio"/>       | <input type="radio"/> | <input type="radio"/>       | <input type="radio"/> | <input type="radio"/> | <input type="radio"/> |
| How well do you understand spoken L3?  | <input type="radio"/> | <input type="radio"/> | <input type="radio"/> | <input type="radio"/>       | <input type="radio"/> | <input type="radio"/>       | <input type="radio"/> | <input type="radio"/> | <input type="radio"/> |
| How well do you write L3?              | <input type="radio"/> | <input type="radio"/> | <input type="radio"/> | <input type="radio"/>       | <input type="radio"/> | <input type="radio"/>       | <input type="radio"/> | <input type="radio"/> | <input type="radio"/> |
| How well do you understand written L3? | <input type="radio"/> | <input type="radio"/> | <input type="radio"/> | <input type="radio"/>       | <input type="radio"/> | <input type="radio"/>       | <input type="radio"/> | <input type="radio"/> | <input type="radio"/> |

3. Past exposure: While learning L3, how much did you use it with...?

If a group of people listed below is not applicable to you (e.g. "brothers and sisters" if you are a single child), please select "N/A".

|                                                                      | Never                 | Very rarely           | Rarely                | Occasionally          | Frequently            | Very frequently       | Always                | N/A                   |
|----------------------------------------------------------------------|-----------------------|-----------------------|-----------------------|-----------------------|-----------------------|-----------------------|-----------------------|-----------------------|
| Your mother / guardian 1                                             | <input type="radio"/> |
| Your father / guardian 2                                             | <input type="radio"/> |
| Your brothers and sisters                                            | <input type="radio"/> |
| Other adults in the household                                        | <input type="radio"/> |
| Other members of your family                                         | <input type="radio"/> |
| Your friends                                                         | <input type="radio"/> |
| People at school / work                                              | <input type="radio"/> |
| People in the community (e.g. in local shops, with neighbours, etc.) | <input type="radio"/> |

Please enter any comment below.

4. Current use: With other people, do you use L3...?

If a group of people listed below is not applicable to you (e.g. "brothers and sisters" if you are a single child), please select "N/A".

|                                                             | Never                 | Very rarely           | Rarely                | Occasionally          | Frequently            | Very frequently       | Always                | N/A                   |
|-------------------------------------------------------------|-----------------------|-----------------------|-----------------------|-----------------------|-----------------------|-----------------------|-----------------------|-----------------------|
| With your mother / guardian 1                               | <input type="radio"/> |
| With your father / guardian 2                               | <input type="radio"/> |
| With your brothers and sisters                              | <input type="radio"/> |
| With your partner (e.g. husband/wife, boyfriend/girlfriend) | <input type="radio"/> |
| With your children                                          | <input type="radio"/> |
| With other members of your family                           | <input type="radio"/> |
| With your friends                                           | <input type="radio"/> |
| At school / work                                            | <input type="radio"/> |
| With your flatmates                                         | <input type="radio"/> |
| In the community                                            | <input type="radio"/> |

Other (please specify)

5. Current use: In your mind, do you use L3 to...?

|                           | Never                 | Very rarely           | Rarely                | Occasionally          | Frequently            | Very frequently       | Always                |
|---------------------------|-----------------------|-----------------------|-----------------------|-----------------------|-----------------------|-----------------------|-----------------------|
| Express emotions          | <input type="radio"/> |
| Swear                     | <input type="radio"/> |
| Remember some information | <input type="radio"/> |
| Do maths                  | <input type="radio"/> |
| Think                     | <input type="radio"/> |

6. Current use: Do you use L3 when...?

|                                                | Never                 | Very rarely           | Rarely                | Occasionally          | Frequently            | Very frequently       | Always                |
|------------------------------------------------|-----------------------|-----------------------|-----------------------|-----------------------|-----------------------|-----------------------|-----------------------|
| Reading                                        | <input type="radio"/> |
| Watching TV or videos / listening to the radio | <input type="radio"/> |
| Using computers / tablets                      | <input type="radio"/> |
| Doing other activities outside of home         | <input type="radio"/> |

7. Is there anything else you wish to tell us about your L3 past exposure / past or current use?

8. Do you know any other languages?

- Yes  
 No

# Autism & Bilingualism Census



## ABC - Autism and Bilingualism Census

### Fourth language

This page will focus on your fourth language.

#### 1. Fourth Language

What is your fourth language (L4)?

How old were you when you first encountered L4?

How did you first encounter L4?

#### 2. Current L4 proficiency

|                                        | Not at all            | Very poor             | Poor                  | Slightly less than adequate | Adequate              | Slightly more than adequate | Good                  | Very good             | Excellent             |
|----------------------------------------|-----------------------|-----------------------|-----------------------|-----------------------------|-----------------------|-----------------------------|-----------------------|-----------------------|-----------------------|
| How well do you speak L4?              | <input type="radio"/> | <input type="radio"/> | <input type="radio"/> | <input type="radio"/>       | <input type="radio"/> | <input type="radio"/>       | <input type="radio"/> | <input type="radio"/> | <input type="radio"/> |
| How well do you understand spoken L4?  | <input type="radio"/> | <input type="radio"/> | <input type="radio"/> | <input type="radio"/>       | <input type="radio"/> | <input type="radio"/>       | <input type="radio"/> | <input type="radio"/> | <input type="radio"/> |
| How well do you write L4?              | <input type="radio"/> | <input type="radio"/> | <input type="radio"/> | <input type="radio"/>       | <input type="radio"/> | <input type="radio"/>       | <input type="radio"/> | <input type="radio"/> | <input type="radio"/> |
| How well do you understand written L4? | <input type="radio"/> | <input type="radio"/> | <input type="radio"/> | <input type="radio"/>       | <input type="radio"/> | <input type="radio"/>       | <input type="radio"/> | <input type="radio"/> | <input type="radio"/> |

3. Past exposure: While learning L4, how much did you use it with...?

If a group of people listed below is not applicable to you (e.g. "brothers and sisters" if you are a single child), please select "N/A".

|                                                                      | Never                 | Very rarely           | Rarely                | Occasionally          | Frequently            | Very frequently       | Always                | N/A                   |
|----------------------------------------------------------------------|-----------------------|-----------------------|-----------------------|-----------------------|-----------------------|-----------------------|-----------------------|-----------------------|
| Your mother / guardian 1                                             | <input type="radio"/> |
| Your father / guardian 2                                             | <input type="radio"/> |
| Your brothers and sisters                                            | <input type="radio"/> |
| Other adults in the household                                        | <input type="radio"/> |
| Other members of your family                                         | <input type="radio"/> |
| Your friends                                                         | <input type="radio"/> |
| People at school / work                                              | <input type="radio"/> |
| People in the community (e.g. in local shops, with neighbours, etc.) | <input type="radio"/> |

Please enter any comment below.

4. Current use: With other people, do you use L4...?

If a group of people listed below is not applicable to you (e.g. "brothers and sisters" if you are a single child), please select "N/A".

|                                                             | Never                 | Very rarely           | Rarely                | Occasionally          | Frequently            | Very frequently       | Always                | N/A                   |
|-------------------------------------------------------------|-----------------------|-----------------------|-----------------------|-----------------------|-----------------------|-----------------------|-----------------------|-----------------------|
| With your mother / guardian 1                               | <input type="radio"/> |
| With your father / guardian 2                               | <input type="radio"/> |
| With your brothers and sisters                              | <input type="radio"/> |
| With your partner (e.g. husband/wife, boyfriend/girlfriend) | <input type="radio"/> |
| With your children                                          | <input type="radio"/> |
| With other members of your family                           | <input type="radio"/> |
| With your friends                                           | <input type="radio"/> |
| At school / work                                            | <input type="radio"/> |
| With your flatmates                                         | <input type="radio"/> |
| In the community                                            | <input type="radio"/> |

Other (please specify)

5. Current use: In your mind, do you use L4 to...?

|                           | Never                 | Very rarely           | Rarely                | Occasionally          | Frequently            | Very frequently       | Always                |
|---------------------------|-----------------------|-----------------------|-----------------------|-----------------------|-----------------------|-----------------------|-----------------------|
| Express emotions          | <input type="radio"/> |
| Swear                     | <input type="radio"/> |
| Remember some information | <input type="radio"/> |
| Do maths                  | <input type="radio"/> |
| Think                     | <input type="radio"/> |

6. Current use: Do you use L4 when...?

|                                                | Never                 | Very rarely           | Rarely                | Occasionally          | Frequently            | Very frequently       | Always                |
|------------------------------------------------|-----------------------|-----------------------|-----------------------|-----------------------|-----------------------|-----------------------|-----------------------|
| Reading                                        | <input type="radio"/> |
| Watching TV or videos / listening to the radio | <input type="radio"/> |
| Using computers / tablets                      | <input type="radio"/> |
| Doing other activities outside of home         | <input type="radio"/> |

7. Is there anything else you wish to tell us about your L4 past exposure / past or current use?

8. Do you know any other languages?

- Yes  
 No

# Autism & Bilingualism Census

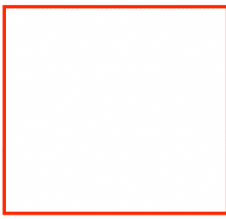

## ABC - Autism and Bilingualism Census

### Fifth language

This page will focus on your fifth language.

1. Fifth Language

What is your fifth language (L5)?

How old were you when you first encountered L5?

How did you first encounter L5?

2. Current L5 proficiency

|                                        | Not at all            | Very poor             | Poor                  | Slightly less than adequate | Adequate              | Slightly more than adequate | Good                  | Very good             | Excellent             |
|----------------------------------------|-----------------------|-----------------------|-----------------------|-----------------------------|-----------------------|-----------------------------|-----------------------|-----------------------|-----------------------|
| How well do you speak L5?              | <input type="radio"/> | <input type="radio"/> | <input type="radio"/> | <input type="radio"/>       | <input type="radio"/> | <input type="radio"/>       | <input type="radio"/> | <input type="radio"/> | <input type="radio"/> |
| How well do you understand spoken L5?  | <input type="radio"/> | <input type="radio"/> | <input type="radio"/> | <input type="radio"/>       | <input type="radio"/> | <input type="radio"/>       | <input type="radio"/> | <input type="radio"/> | <input type="radio"/> |
| How well do you write L5?              | <input type="radio"/> | <input type="radio"/> | <input type="radio"/> | <input type="radio"/>       | <input type="radio"/> | <input type="radio"/>       | <input type="radio"/> | <input type="radio"/> | <input type="radio"/> |
| How well do you understand written L5? | <input type="radio"/> | <input type="radio"/> | <input type="radio"/> | <input type="radio"/>       | <input type="radio"/> | <input type="radio"/>       | <input type="radio"/> | <input type="radio"/> | <input type="radio"/> |

3. Past exposure: While learning L5, how much did you use it with...?

If a group of people listed below is not applicable to you (e.g. "brothers and sisters" if you are a single child), please select "N/A".

|                                                                      | Never                 | Very rarely           | Rarely                | Occasionally          | Frequently            | Very frequently       | Always                | N/A                   |
|----------------------------------------------------------------------|-----------------------|-----------------------|-----------------------|-----------------------|-----------------------|-----------------------|-----------------------|-----------------------|
| Your mother / guardian 1                                             | <input type="radio"/> |
| Your father / guardian 2                                             | <input type="radio"/> |
| Your brothers and sisters                                            | <input type="radio"/> |
| Other adults in the household                                        | <input type="radio"/> |
| Other members of your family                                         | <input type="radio"/> |
| Your friends                                                         | <input type="radio"/> |
| People at school / work                                              | <input type="radio"/> |
| People in the community (e.g. in local shops, with neighbours, etc.) | <input type="radio"/> |

Please enter any comment below.

4. Current use: With other people, do you use L5...?

If a group of people listed below is not applicable to you (e.g. "brothers and sisters" if you are a single child), please select "N/A".

|                                                             | Never                 | Very rarely           | Rarely                | Occasionally          | Frequently            | Very frequently       | Always                | N/A                   |
|-------------------------------------------------------------|-----------------------|-----------------------|-----------------------|-----------------------|-----------------------|-----------------------|-----------------------|-----------------------|
| With your mother / guardian 1                               | <input type="radio"/> |
| With your father / guardian 2                               | <input type="radio"/> |
| With your brothers and sisters                              | <input type="radio"/> |
| With your partner (e.g. husband/wife, boyfriend/girlfriend) | <input type="radio"/> |
| With your children                                          | <input type="radio"/> |
| With other members of your family                           | <input type="radio"/> |
| With your friends                                           | <input type="radio"/> |
| At school / work                                            | <input type="radio"/> |
| With your flatmates                                         | <input type="radio"/> |
| In the community                                            | <input type="radio"/> |

Other (please specify)



5. Current use: In your mind, do you use L5 to...?

|                           | Never                 | Very rarely           | Rarely                | Occasionally          | Frequently            | Very frequently       | Always                |
|---------------------------|-----------------------|-----------------------|-----------------------|-----------------------|-----------------------|-----------------------|-----------------------|
| Express emotions          | <input type="radio"/> |
| Swear                     | <input type="radio"/> |
| Remember some information | <input type="radio"/> |
| Do maths                  | <input type="radio"/> |
| Think                     | <input type="radio"/> |

6. Current use: Do you use L5 when...?

|                                                | Never                 | Very rarely           | Rarely                | Occasionally          | Frequently            | Very frequently       | Always                |
|------------------------------------------------|-----------------------|-----------------------|-----------------------|-----------------------|-----------------------|-----------------------|-----------------------|
| Reading                                        | <input type="radio"/> |
| Watching TV or videos / listening to the radio | <input type="radio"/> |
| Using computers / tablets                      | <input type="radio"/> |
| Doing other activities outside of home         | <input type="radio"/> |

7. Is there anything else you wish to tell us about your L5 past exposure / past or current use?

8. Do you know any other languages?

- Yes  
 No

# Autism & Bilingualism Census



## ABC - Autism and Bilingualism Census

Sixth language

**This page will focus on your sixth language.**

### 1. Sixth Language

What is your sixth language (L6)?

How old were you when you first encountered L6?

How did you first encounter L6?

### 2. Current L6 proficiency

|                                        | Not at all            | Very poor             | Poor                  | Slightly less than adequate | Adequate              | Slightly more than adequate | Good                  | Very good             | Excellent             |
|----------------------------------------|-----------------------|-----------------------|-----------------------|-----------------------------|-----------------------|-----------------------------|-----------------------|-----------------------|-----------------------|
| How well do you speak L6?              | <input type="radio"/> | <input type="radio"/> | <input type="radio"/> | <input type="radio"/>       | <input type="radio"/> | <input type="radio"/>       | <input type="radio"/> | <input type="radio"/> | <input type="radio"/> |
| How well do you understand spoken L6?  | <input type="radio"/> | <input type="radio"/> | <input type="radio"/> | <input type="radio"/>       | <input type="radio"/> | <input type="radio"/>       | <input type="radio"/> | <input type="radio"/> | <input type="radio"/> |
| How well do you write L6?              | <input type="radio"/> | <input type="radio"/> | <input type="radio"/> | <input type="radio"/>       | <input type="radio"/> | <input type="radio"/>       | <input type="radio"/> | <input type="radio"/> | <input type="radio"/> |
| How well do you understand written L6? | <input type="radio"/> | <input type="radio"/> | <input type="radio"/> | <input type="radio"/>       | <input type="radio"/> | <input type="radio"/>       | <input type="radio"/> | <input type="radio"/> | <input type="radio"/> |

3. Past exposure: While learning L6, how much did you use it with...?

If a group of people listed below is not applicable to you (e.g. "brothers and sisters" if you are a single child), please select "N/A".

|                                                                      | Never                 | Very rarely           | Rarely                | Occasionally          | Frequently            | Very frequently       | Always                | N/A                   |
|----------------------------------------------------------------------|-----------------------|-----------------------|-----------------------|-----------------------|-----------------------|-----------------------|-----------------------|-----------------------|
| Your mother / guardian 1                                             | <input type="radio"/> |
| Your father / guardian 2                                             | <input type="radio"/> |
| Your brothers and sisters                                            | <input type="radio"/> |
| Other adults in the household                                        | <input type="radio"/> |
| Other members of your family                                         | <input type="radio"/> |
| Your friends                                                         | <input type="radio"/> |
| People at school / work                                              | <input type="radio"/> |
| People in the community (e.g. in local shops, with neighbours, etc.) | <input type="radio"/> |

Please enter any comment below.

4. Current use: With other people, do you use L6...?

If a group of people listed below is not applicable to you (e.g. "brothers and sisters" if you are a single child), please select "N/A".

|                                                             | Never                 | Very rarely           | Rarely                | Occasionally          | Frequently            | Very frequently       | Always                | N/A                   |
|-------------------------------------------------------------|-----------------------|-----------------------|-----------------------|-----------------------|-----------------------|-----------------------|-----------------------|-----------------------|
| With your mother / guardian 1                               | <input type="radio"/> |
| With your father / guardian 2                               | <input type="radio"/> |
| With your brothers and sisters                              | <input type="radio"/> |
| With your partner (e.g. husband/wife, boyfriend/girlfriend) | <input type="radio"/> |
| With your children                                          | <input type="radio"/> |
| With other members of your family                           | <input type="radio"/> |
| With your friends                                           | <input type="radio"/> |
| At school / work                                            | <input type="radio"/> |
| With your flatmates                                         | <input type="radio"/> |
| In the community                                            | <input type="radio"/> |

Other (please specify)

5. Current use: In your mind, do you use L6 to...?

|                           | Never                 | Very rarely           | Rarely                | Occasionally          | Frequently            | Very frequently       | Always                |
|---------------------------|-----------------------|-----------------------|-----------------------|-----------------------|-----------------------|-----------------------|-----------------------|
| Express emotions          | <input type="radio"/> |
| Swear                     | <input type="radio"/> |
| Remember some information | <input type="radio"/> |
| Do maths                  | <input type="radio"/> |
| Think                     | <input type="radio"/> |

6. Current use: Do you use L6 when...?

|                                                | Never                 | Very rarely           | Rarely                | Occasionally          | Frequently            | Very frequently       | Always                |
|------------------------------------------------|-----------------------|-----------------------|-----------------------|-----------------------|-----------------------|-----------------------|-----------------------|
| Reading                                        | <input type="radio"/> |
| Watching TV or videos / listening to the radio | <input type="radio"/> |
| Using computers / tablets                      | <input type="radio"/> |
| Doing other activities outside of home         | <input type="radio"/> |

7. Is there anything else you wish to tell us about your L6 past exposure / past or current use?

8. Do you know any other languages?

- Yes  
 No

# Autism & Bilingualism Census



## ABC - Autism and Bilingualism Census

### Seventh language

**This page will focus on your seventh language.**

#### 1. Seventh Language

What is your sixth language (L7)?

How old were you when you first encountered L7?

How did you first encounter L7?

#### 2. Current L7 proficiency

|                                        | Not at all            | Very poor             | Poor                  | Slightly less than adequate | Adequate              | Slightly more than adequate | Good                  | Very good             | Excellent             |
|----------------------------------------|-----------------------|-----------------------|-----------------------|-----------------------------|-----------------------|-----------------------------|-----------------------|-----------------------|-----------------------|
| How well do you speak L7?              | <input type="radio"/> | <input type="radio"/> | <input type="radio"/> | <input type="radio"/>       | <input type="radio"/> | <input type="radio"/>       | <input type="radio"/> | <input type="radio"/> | <input type="radio"/> |
| How well do you understand spoken L7?  | <input type="radio"/> | <input type="radio"/> | <input type="radio"/> | <input type="radio"/>       | <input type="radio"/> | <input type="radio"/>       | <input type="radio"/> | <input type="radio"/> | <input type="radio"/> |
| How well do you write L7?              | <input type="radio"/> | <input type="radio"/> | <input type="radio"/> | <input type="radio"/>       | <input type="radio"/> | <input type="radio"/>       | <input type="radio"/> | <input type="radio"/> | <input type="radio"/> |
| How well do you understand written L7? | <input type="radio"/> | <input type="radio"/> | <input type="radio"/> | <input type="radio"/>       | <input type="radio"/> | <input type="radio"/>       | <input type="radio"/> | <input type="radio"/> | <input type="radio"/> |

3. Past exposure: While learning L7, how much did you use it with...?

If a group of people listed below is not applicable to you (e.g. "brothers and sisters" if you are a single child), please select "N/A".

|                                                                      | Never                 | Very rarely           | Rarely                | Occasionally          | Frequently            | Very frequently       | Always                | N/A                   |
|----------------------------------------------------------------------|-----------------------|-----------------------|-----------------------|-----------------------|-----------------------|-----------------------|-----------------------|-----------------------|
| Your mother / guardian 1                                             | <input type="radio"/> |
| Your father / guardian 2                                             | <input type="radio"/> |
| Your brothers and sisters                                            | <input type="radio"/> |
| Other adults in the household                                        | <input type="radio"/> |
| Other members of your family                                         | <input type="radio"/> |
| Your friends                                                         | <input type="radio"/> |
| People at school / work                                              | <input type="radio"/> |
| People in the community (e.g. in local shops, with neighbours, etc.) | <input type="radio"/> |

Please enter any comment below.

4. Current use: With other people, do you use L7...?

If a group of people listed below is not applicable to you (e.g. "brothers and sisters" if you are a single child), please select "N/A".

|                                                             | Never                 | Very rarely           | Rarely                | Occasionally          | Frequently            | Very frequently       | Always                | N/A                   |
|-------------------------------------------------------------|-----------------------|-----------------------|-----------------------|-----------------------|-----------------------|-----------------------|-----------------------|-----------------------|
| With your mother / guardian 1                               | <input type="radio"/> |
| With your father / guardian 2                               | <input type="radio"/> |
| With your brothers and sisters                              | <input type="radio"/> |
| With your partner (e.g. husband/wife, boyfriend/girlfriend) | <input type="radio"/> |
| With your children                                          | <input type="radio"/> |
| With other members of your family                           | <input type="radio"/> |
| With your friends                                           | <input type="radio"/> |
| At school / work                                            | <input type="radio"/> |
| With your flatmates                                         | <input type="radio"/> |
| In the community                                            | <input type="radio"/> |

Other (please specify)

5. Current use: In your mind, do you use L7 to...?

|                           | Never                 | Very rarely           | Rarely                | Occasionally          | Frequently            | Very frequently       | Always                |
|---------------------------|-----------------------|-----------------------|-----------------------|-----------------------|-----------------------|-----------------------|-----------------------|
| Express emotions          | <input type="radio"/> |
| Swear                     | <input type="radio"/> |
| Remember some information | <input type="radio"/> |
| Do maths                  | <input type="radio"/> |
| Think                     | <input type="radio"/> |

6. Current use: Do you use L7 when...?

|                                                | Never                 | Very rarely           | Rarely                | Occasionally          | Frequently            | Very frequently       | Always                |
|------------------------------------------------|-----------------------|-----------------------|-----------------------|-----------------------|-----------------------|-----------------------|-----------------------|
| Reading                                        | <input type="radio"/> |
| Watching TV or videos / listening to the radio | <input type="radio"/> |
| Using computers / tablets                      | <input type="radio"/> |
| Doing other activities outside of home         | <input type="radio"/> |

7. Is there anything else you wish to tell us about your L7 past exposure / past or current use?

8. Do you know any other languages?

No

Yes.

Please list all your other languages below. We will not ask for further details regarding these languages.

# Autism & Bilingualism Census

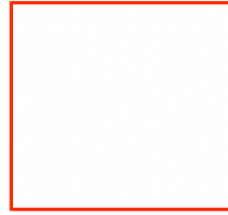

## ABC - Autism and Bilingualism Census

Autism and bilingualism

**This page will focus on what it means to you to be both bilingual and on the autism spectrum.**

1. Do you find learning several languages challenging? Why? Do you think being on the autism spectrum affects how you learn languages?

2. Do you find learning several languages useful? Why? Do you think knowing several languages is important / useful for someone on the autism spectrum?

3. Do you think bilingualism influences your life as someone on the autism spectrum ? If so, how ?



# Autism & Bilingualism Census

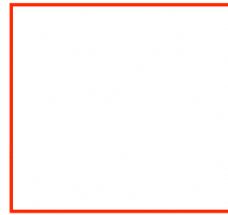

## ABC - Autism and Bilingualism Census

Thank you for your participation!

**Thank you very much for your participation!**  
**This survey is the first study of a wider research project on Autism and Bilingualism. If you would like to help us in the next steps, please fill in the items below. Be assured that your help will be greatly appreciated.**

For more information on the research project and to follow the outcome of this survey, please visit

If you have questions about the study, please feel free to contact me at .

If you have any concerns or complaints you wish to address to someone other than the investigator or direct supervisors, you may reach the external contact person at .

1. Is there anything you want to tell us but we didn't ask?

2. How did you hear about the Autism and Bilingualism Census?

*e.g. word of mouth, Twitter, Facebook, from my employer, from my university, from another organisation (please provide the name), etc.*

3. Would you like to hear more from us?

|                                                                          | Yes                   | No                    |
|--------------------------------------------------------------------------|-----------------------|-----------------------|
| Receive a summary of the survey results                                  | <input type="radio"/> | <input type="radio"/> |
| Receive general news about the project                                   | <input type="radio"/> | <input type="radio"/> |
| Receive an invitation to join the next part of this project              | <input type="radio"/> | <input type="radio"/> |
| Joining a mailing list about participation in other projects by our team | <input type="radio"/> | <input type="radio"/> |

4. If you answered "Yes" to any item in the previous question, please complete any of these options depending on your preference.

*Whatever items you tick, this only means we will send you more information. At any stage you can unsubscribe from information from us, and there is no obligation to take part in further research.*

Email address

Phone number (you can call me)

Phone number (you can text me)

Postal address

Other contact details (e.g. twitter)

Do you know anyone who could be interested in filling this survey and learning more about the project?

Do feel free to share ABC with them!

<https://www.surveymonkey.co.uk/r/>
