# Supplementary material for: Bilingualism in autism: Language learning profiles and social experiences
Source: PubMed Central journal article supplement — Autism. 2020 Jul 17;24(8):2166–77. doi: 10.1177/1362361320937845 (PMC7549289; doi:10.1177/1362361320937845), 2020-07-17
Supplement: ABC_Paper_1_-_FV_-_Sup_Mat_3.pdf [file ABC_Paper_1_-_FV_-_Sup_Mat_3.pdf]

### Supplementary Materials s3: Language history of the respondents

**Table s3.**

*Respondents' Acquisition and Current Contexts of Use*

| L  | A. Acquisition context, N (%) |           |           |           |      | B. Current context, N (%) |           |          |           |      |
|----|-------------------------------|-----------|-----------|-----------|------|---------------------------|-----------|----------|-----------|------|
|    | Home                          | School    | Com.      | Indep.    | Tot. | Home                      | S/W       | Com.     | Indep.    | Tot. |
| L2 | 202 (97.6)                    | 2 (1.0)   | 2 (1.0)   | 1 (0.5)   | 207  | 201 (96.6)                | 3 (1.4)   | 3 (1.4)  | 1 (0.5)   | 208  |
| L2 | 50 (24.0)                     | 86 (41.3) | 19 (9.1)  | 53 (25.5) | 208  | 73 (35.3)                 | 46 (22.2) | 13 (6.3) | 75 (36.2) | 207  |
| L3 | 13 (11.8)                     | 29 (26.4) | 17 (15.5) | 51 (46.4) | 110  | 15 (13.6)                 | 24 (21.8) | 7 (6.4)  | 64 (58.2) | 110  |
| L4 | 5 (9.3)                       | 16 (29.6) | 5 (9.3)   | 28 (51.9) | 54   | 6 (11.1)                  | 6 (11.1)  | 4 (7.4)  | 38 (78.4) | 54   |
| L5 | 1 (3.6)                       | 10 (35.7) | 1 (3.6)   | 16 (57.1) | 28   | 5 (17.9)                  | 5 (17.9)  | 0 (0.0)  | 18 (64.3) | 28   |
| L6 | 2 (14.3)                      | 3 (21.4)  | 0 (0.0)   | 9 (64.3)  | 14   | 2 (14.3)                  | 1 (7.1)   | 0 (0.0)  | 11 (78.6) | 14   |
| L7 | 1 (20.0)                      | 0 (0.0)   | 0 (0.0)   | 4 (80.0)  | 5    | 1 (20)                    | 0 (0.0)   | 0 (0.0)  | 4 (80.0)  | 5    |

*Note.* Some percentages do not sum up to 100% due to cumulative rounding effects.

A. Acquisition context: Number and proportion of respondents who acquired their languages (L) 1 to 7 mostly at home, at school, in the community (Com.), or independently (Indep.), and total number (Tot.) of respondents who indicated a context of acquisition for the language.

B. Current context: Number and proportion of respondents who use their languages (L) 1 to 7 mostly at home, at school or at work (S/W), in the community (Com.), or independently (Indep.), and total number (Tot.) of respondents who indicated a current context of use for the language.
